# Supplementary material for: AuNPs/Ti3C2 Signal-Enhanced Surface Plasmon Resonance Imaging Biosensor for Ultrasensitive Detection of miRNA
Source: MDPI journal article supplement (doi:10.3390/chemosensors12040066), 2024-04-17
Supplement: s1 [file s1]

# AuNPs/Ti<sub>3</sub>C<sub>2</sub> signal-enhanced surface plasmon resonance imaging biosensor for ultrasensitive detection of miRNA

Yirui Qin, Li Jiang\*, Rengang Sun, Yunzhu Fang, Boya Shi, Shangzhong Jin

<sup>1</sup> Email: lijia@cjlu.edu.cn

\* College of Optical and Electronic Technology, China Jiliang University, Hangzhou 310018, P. R. China.

**Table. S1.** All nucleic acid probe sequences used.

| Oligonucleotide name | Sequence (5'-3')                                    |
|----------------------|-----------------------------------------------------|
| CP-21                | polyA <sub>15</sub> polyT <sub>5</sub> -TCAACATCAGT |
| miRNA-21             | UAGCUUAUCAGACUGAUGUUGA                              |
| AP-21                | CTGATAAGCTA-polyA <sub>15</sub> polyT <sub>5</sub>  |
| miRNA-141            | UAAGGCACGCGGUGAAUGCCAA                              |
| miRNA-429            | GGUGCAGUGCUGCAUCUCUGGU                              |
| miRNA-200a           | UUGUACUACACAAAAGUACUGG                              |

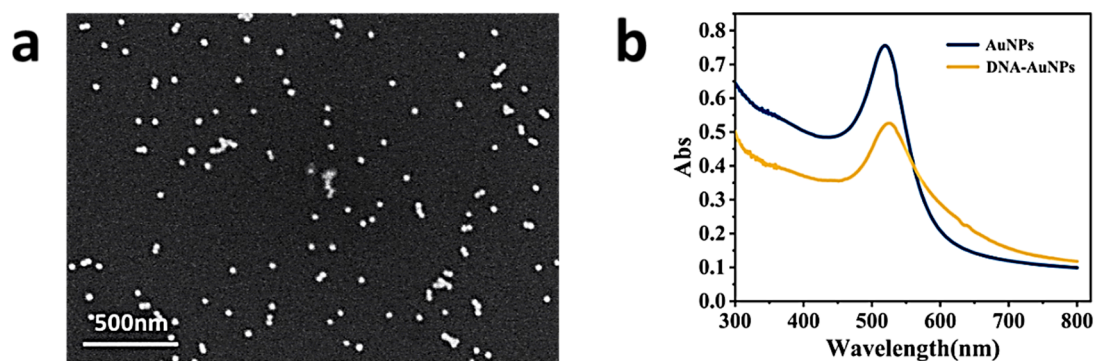

**Figure. S1.** (a) SEM image of AuNPs. (b) UV-visible absorption spectra of AuNPs and DNA-AuNPs.
